# Supplementary material
Source: PubMed Central journal article supplement (PMC3763949)

**Figure S1** Sequence homology between *N.crassa* DHC and *M.musculus* DHC. The Pustell plot was generated using a PAM 250 scoring matrix, a minimum similarity score of 60%, and a window size of 12 and a hash value of 2. Accession numbers for *N.crassa* DHC (XP\_962616.1) and *M.musculus* (NP\_084514.2).

**Figure S2** Quantification of spherical structures. Mean fluorescence intensity (arbitrary units) and the distance between hyphal tips and the spherical structures were measured for wildtype and *Loa* strains. Error bars indicate standard deviation.

**Figure S3** Kymograph analyses of vesicle transport in different strains. Representative kymographs of FM 4-64 positive vesicle transport are shown. Kymographs are oriented with the hyphal tip to the right, distance on the x axis and time on the y axis. Motor-based movements are indicated by the higher velocity diagonal lines that are most abundant in the wildtype kymograph (solid white double-sided arrow). Cytoplasmic streaming causes the general back and forth drift of vesicles during the kymographs (solid black double-sided arrow in wildtype).

**Figure S4** Representative gel slices showing purified dynein from wildtype and *Loa* strains

**Figure S5** Representative gel showing the amount of DHC that co-pellets with microtubules under varied conditions.

**Videos SV1 and SV2** Representative live cell movies of FM 4-64 labeled vesicle trafficking in hyphal tips from wildtype (SV1) and *Loa* (SV2) strains are included as supplemental information. Each movie is 86  $\mu\text{m}$  x 65  $\mu\text{m}$  in size and is sped up six-fold for playback.

**Table S I. Primary *Neurospora crassa* strains used in this study**

| <b>Genotype</b>                                                                                               | <b>Source</b> | <b>Description</b>               |
|---------------------------------------------------------------------------------------------------------------|---------------|----------------------------------|
| <i>mat a</i>                                                                                                  | FGSC          | WT strain (FGSC # 4200)          |
| <i>mat A</i>                                                                                                  | FGSC          | WT strain (FGSC # 2489)          |
| <i>mat A; C102(t); qde-2::Bml<sup>Δ</sup>R; delta mus-52::bar+</i>                                            | This study    | Cot-1 temperature sensitive      |
| <i>mat a; ro-1<sup>K770*</sup>; qde-2::Bml<sup>Δ</sup>R; delta mus-52::bar+</i>                               | This study    | DHC K770Stop                     |
| <i>mat a; ro-1<sup>F607Y</sup>; qde-2::Bml<sup>Δ</sup>R; delta mus-52::bar+</i>                               | This study    | DHC Loa                          |
| <i>mat A ro-6<sup>+</sup>::mCherry<sup>+</sup></i>                                                            | This study    | WT DIC-mCherry                   |
| <i>mat A; ro-3<sup>+</sup>::EGFP<sup>+</sup></i>                                                              | This study    | WT EGFP-dynactin p150            |
| <i>rid(RIP1) mat A his-3<sup>+</sup>::Pccg-1-Bml<sup>+</sup>-sgfp<sup>+</sup></i>                             | FGSC          | Tubulin-GFP (FGSC # 9520)        |
| <i>mat a his-3<sup>+</sup>::Pccg-1-Bml<sup>+</sup>-sgfp<sup>+</sup> ro-6<sup>+</sup>::mcherry<sup>+</sup></i> | This study    | WT, DIC-mCherry - Tub-GFP        |
| <i>his-3<sup>+</sup>::Pccg-1::tdimer2(12)::cax<sup>+</sup></i>                                                | FGSC          | WT RFP-Cax (FGSC # 10157)        |
| <i>mat A ro-6<sup>+</sup>::hs<sup>+</sup></i>                                                                 | This study    | WT DIC-6xHis-Strep-tag II strain |

Figure S1

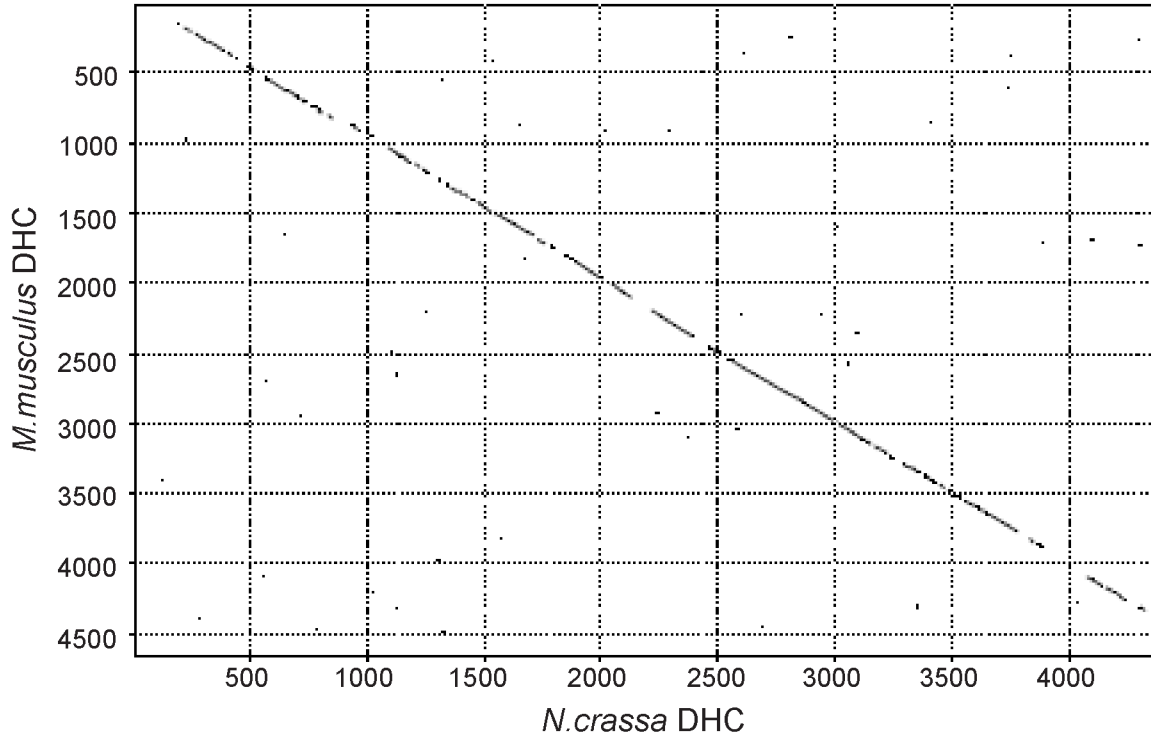

Figure S2

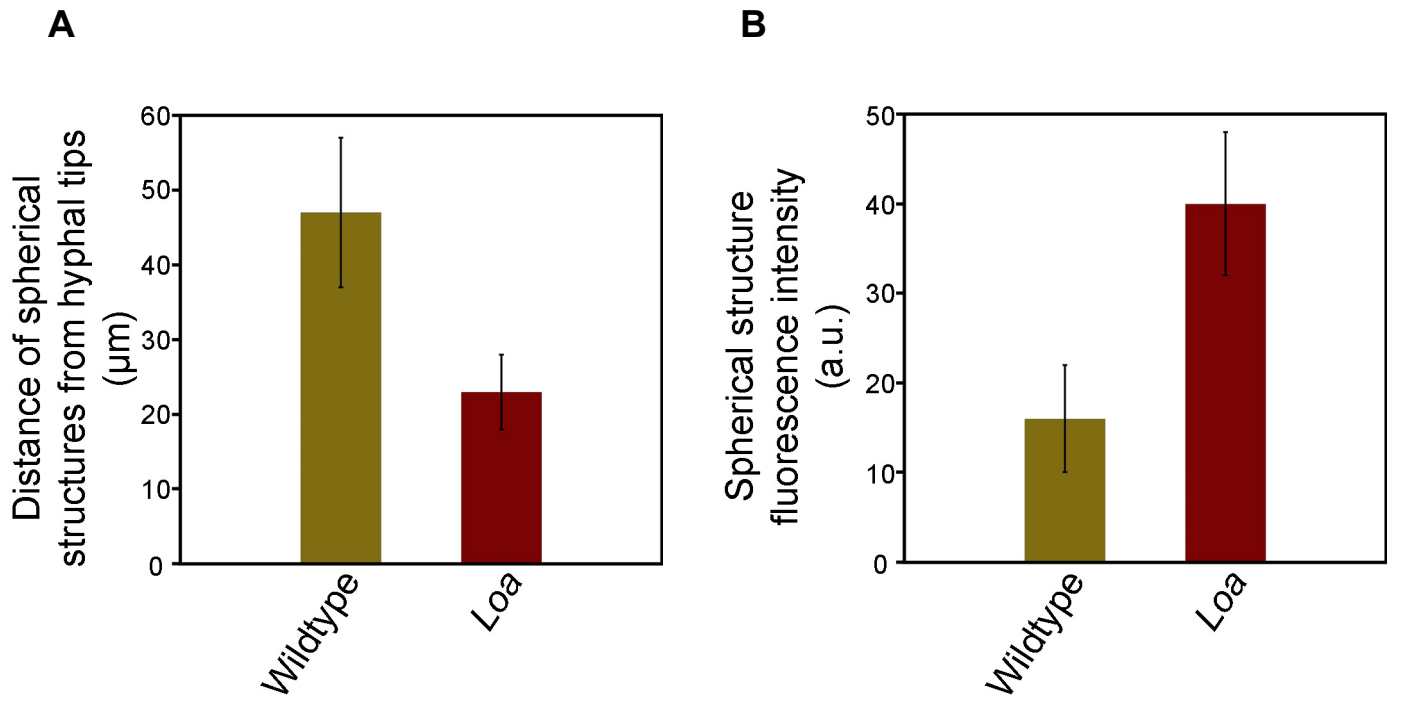

Figure S3

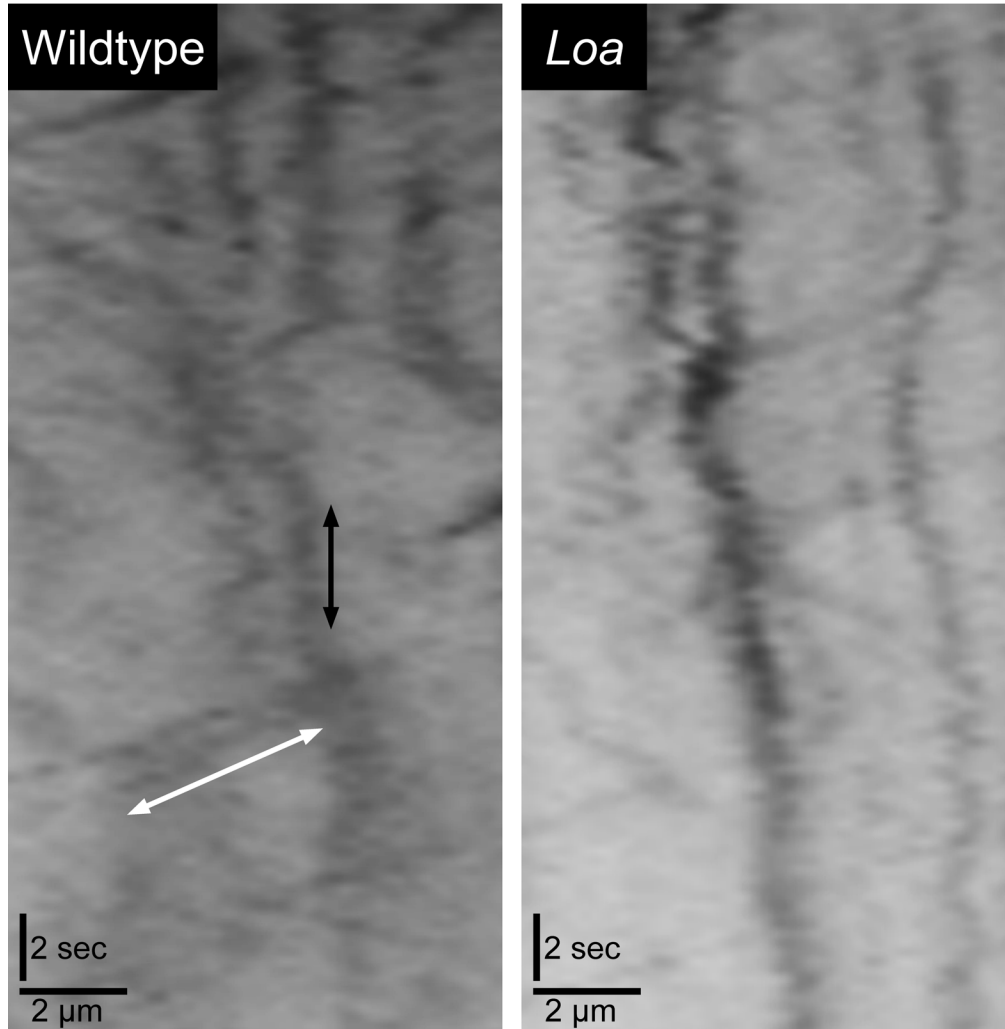

Figure S4

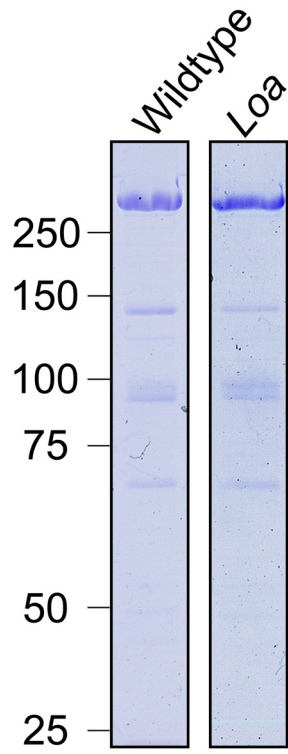

Figure S5

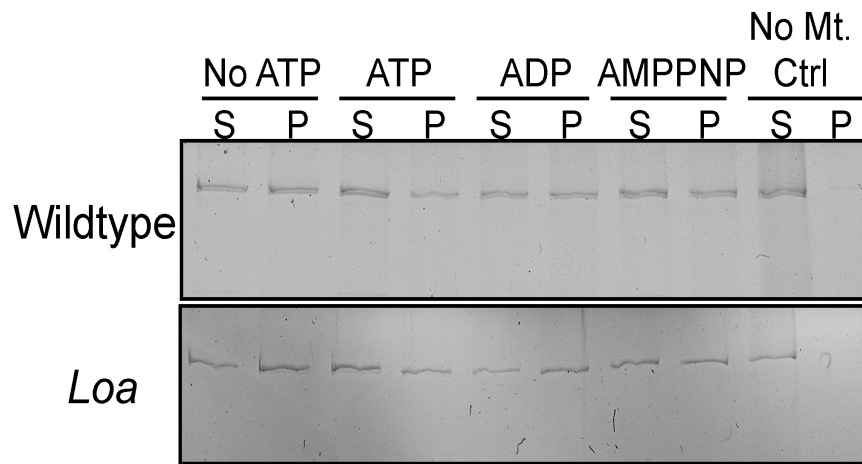

Supplement: NIHMS504232-supplement-Supplemental_Data.pdf [file NIHMS504232-supplement-Supplemental_Data.pdf]
